# Supplementary material for: A tandem photoelectrochemical water splitting cell consisting of CuBi2O4 and BiVO4 synthesized from a single Bi4O5I2 nanosheet template
Source: Royal Society of Chemistry journal article supplement (doi:10.1039/c8fd00183a), 2018-12-21
Supplement: c8fd00183a1.pdf [file c8fd00183a1.pdf]

*Electronic Supporting Information*

**A Tandem Photoelectrochemical Water Splitting Cell Consisting of  $\text{CuBi}_2\text{O}_4$  and  $\text{BiVO}_4$  Synthesized from a Single  $\text{Bi}_4\text{O}_5\text{I}_2$  Nanosheet Template**

Yi-Hsuan Lai<sup>\*a</sup>, Kai-Che Lin<sup>[+]<sup>a</sup></sup>, and Chen-Yang Yen<sup>[+]<sup>a</sup></sup>, and Bo-Jyun Jiang<sup>a</sup>

<sup>a</sup> Department of Materials and Optoelectronic Science, National Sun Yat-sen University, Taiwan, 70 Lienhai Rd., Kaohsiung 80424, Taiwan.

\* Corresponding author: yhlai@mail.nsysu.edu.tw

[+]These authors contributed equally to this work

**Contents**

Supporting Figures S1–S9

page S2-S6

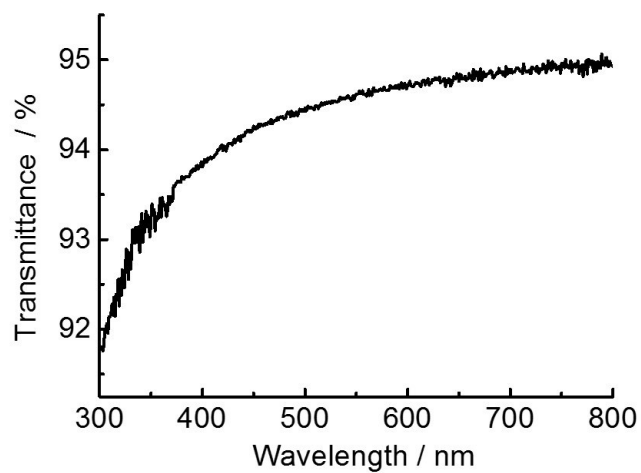

**Figure S1.** The UV-vis transmittance spectrum of Nafion 117™ membrane.

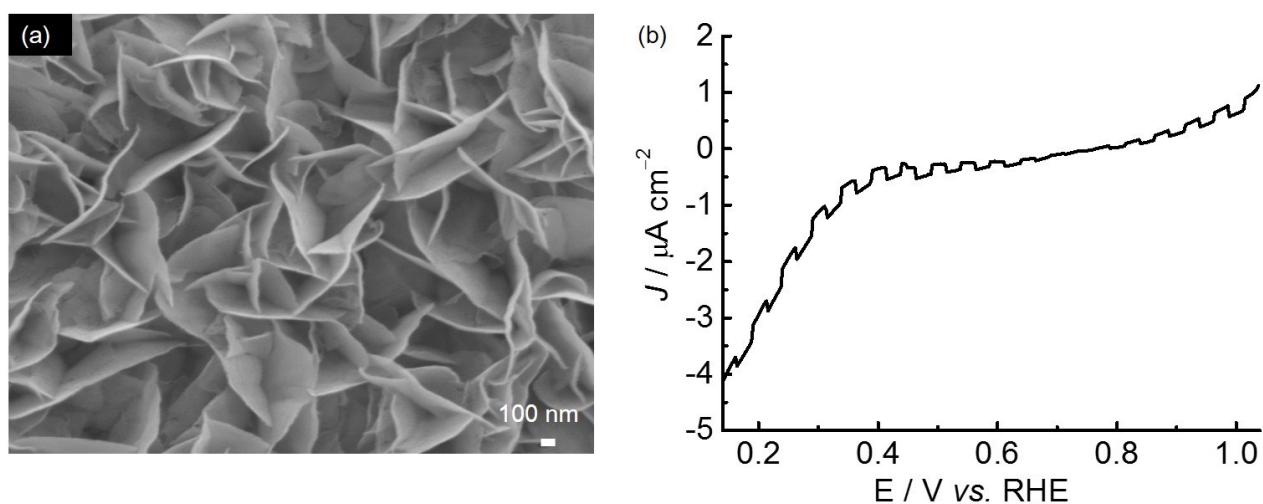

**Figure S2.** The SEM image (a) and (b) current density ( $J$ )–potential ( $E$ ) curve of nanoBi<sub>4</sub>O<sub>5</sub>I<sub>2</sub>. The  $J$ - $E$  curve was recorded in an aqueous 0.1 M Bi buffer solution containing 0.5 M Na<sub>2</sub>SO<sub>4</sub> (pH 9.2) under standardized and chopped solar-light illumination under N<sub>2</sub> atmosphere.

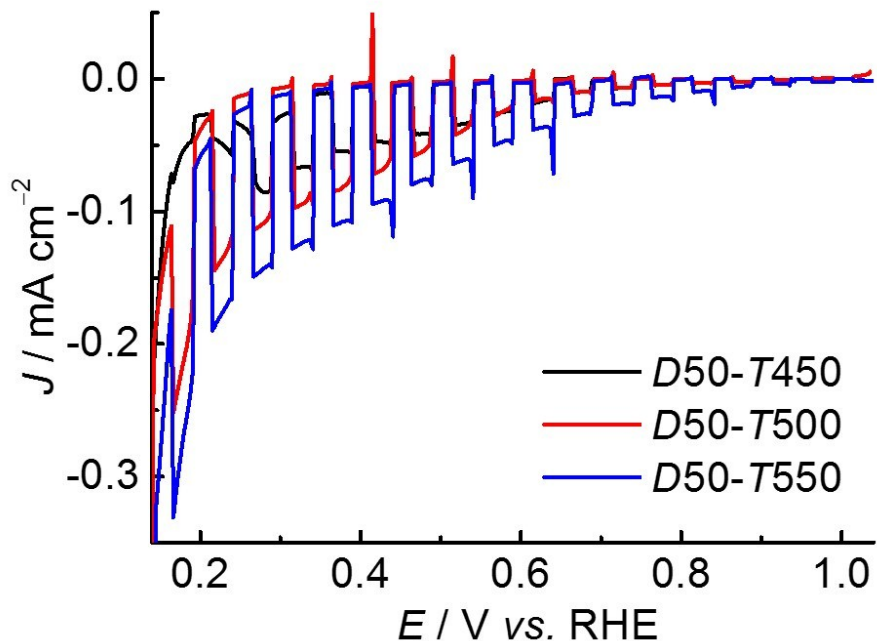

**Figure S3.** The  $J$ - $E$  curves of the  $\text{CuBi}_2\text{O}_4$  converted from  $\text{nanoBi}_4\text{O}_5\text{I}_2$  with  $D = 50 \mu\text{L cm}^{-2}$  and various  $T$ , recording in a 0.1 M  $\text{B}_i$  buffer solution containing 0.5 M  $\text{Na}_2\text{SO}_4$  (pH 9.2) under chopped solar-light illumination ( $100 \text{ mW cm}^{-2}$ , AM 1.5G) under  $\text{N}_2$  atmosphere.

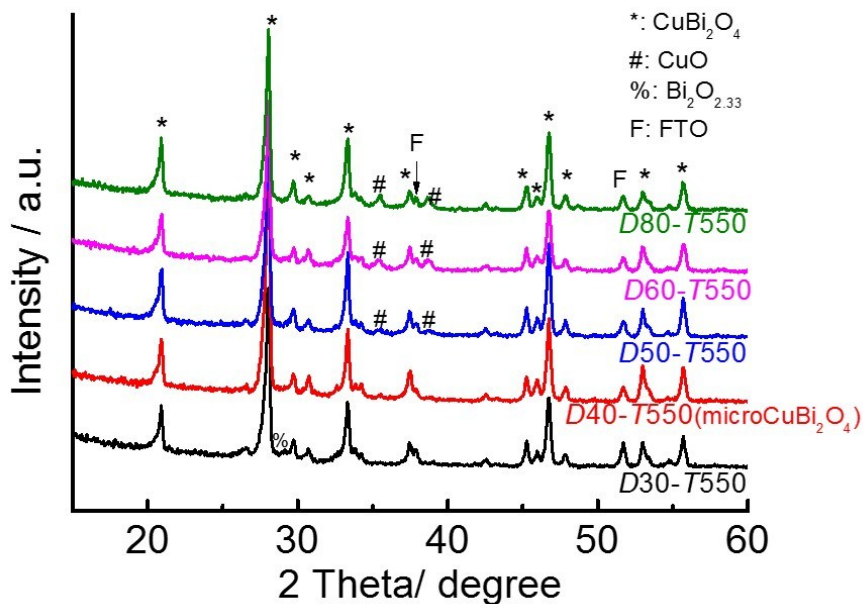

**Figure S4.** GI-XRD patterns of the  $\text{CuBi}_2\text{O}_4$  converted from  $\text{nanoBi}_4\text{O}_5\text{I}_2$  with various  $D$  at  $T=550^\circ\text{C}$ . The second phase of  $\text{Bi}_2\text{O}_{2.33}$  and  $\text{CuO}$  exist if  $D$  is below and above  $40 \mu\text{L cm}^{-2}$ , respectively.

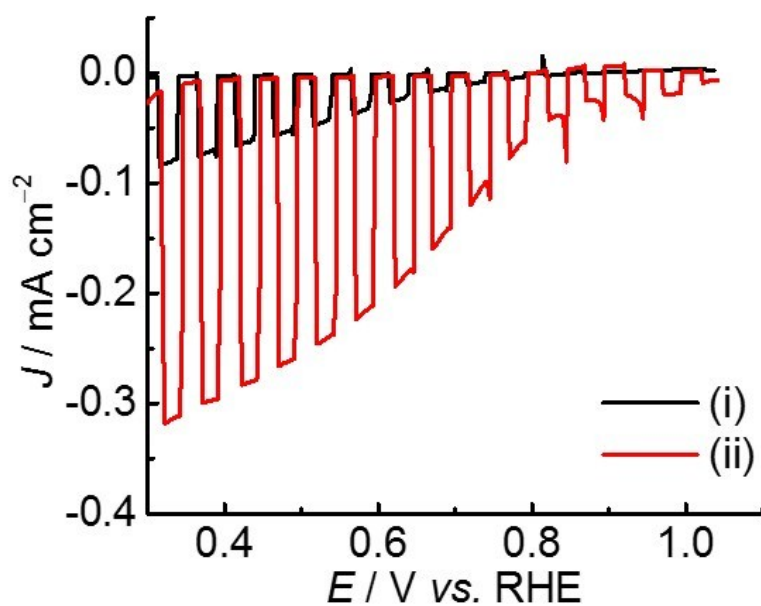

**Figure S5.** The  $J$ - $E$  curve of microCuBi<sub>2</sub>O<sub>4</sub> recorded in an aqueous (i) 0.1 M B<sub>i</sub> buffer solution containing 0.5 M Na<sub>2</sub>SO<sub>4</sub> (pH 9.2) and (ii) 1 M NaOH under chopped solar-light illumination (100 mW cm<sup>-2</sup>, AM 1.5G) under N<sub>2</sub> atmosphere.

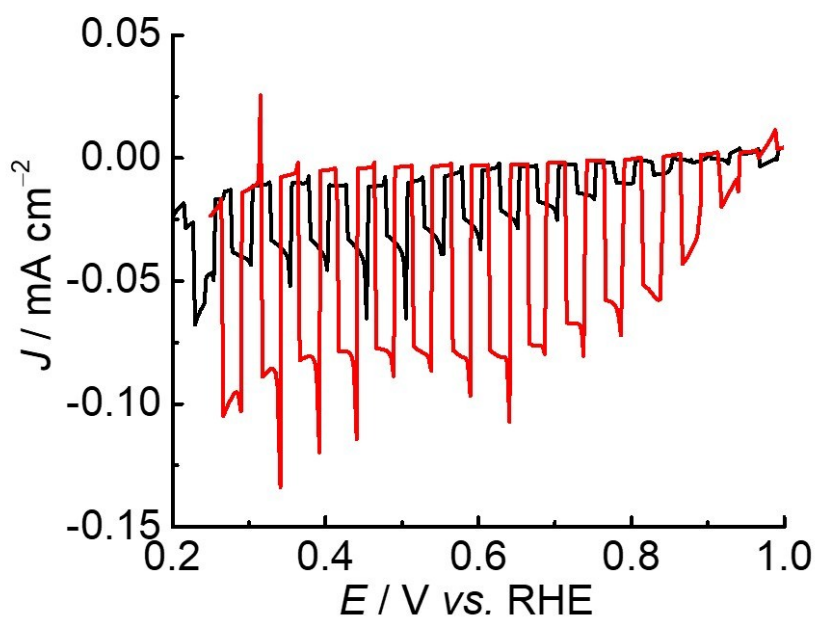

**Figure S6.** The  $J$ - $E$  curve of a microCuBi<sub>2</sub>O<sub>4</sub>|Co-B<sub>i</sub> recorded in an aqueous 0.1 M B<sub>i</sub> buffer solution containing 0.5 M Na<sub>2</sub>SO<sub>4</sub> (pH 9.2) under N<sub>2</sub> atmosphere with standardized solar-light illumination (100 mW cm<sup>-2</sup>, AM 1.5G, red trace) and filtered by a nanoBiVO<sub>4</sub>|Co-B<sub>i</sub> electrode (black trace).

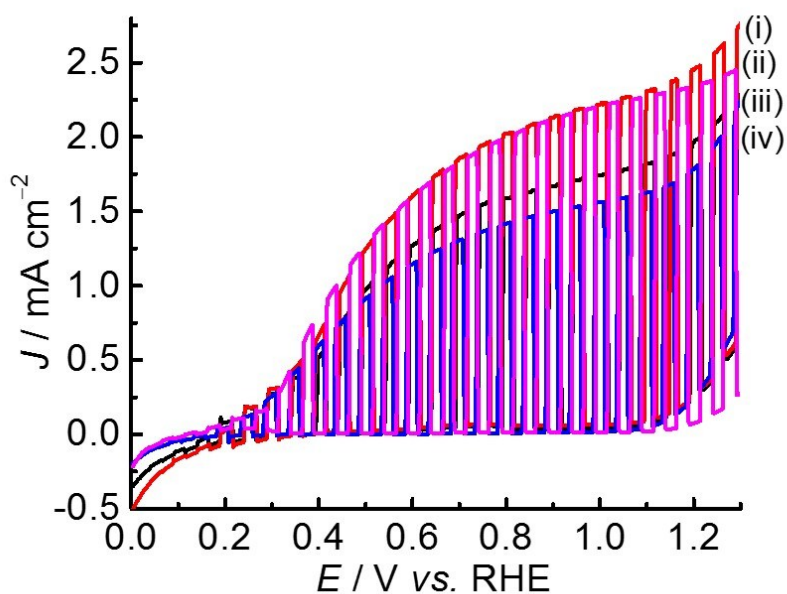

**Figure S7.** The  $J$ - $E$  curve of  $\text{BiVO}_4$  converted from  $\text{nanoBi}_4\text{O}_5\text{I}_2$  with (i)  $D=50 \mu\text{L cm}^{-2}$ , (ii)  $D=67 \mu\text{L cm}^{-2}$ , (iii)  $D=33 \mu\text{L cm}^{-2}$ , and (iv)  $D=83 \mu\text{L cm}^{-2}$ , recording in an aqueous 0.1 M  $\text{B}_i$  buffer solution containing 0.1 M  $\text{Na}_2\text{SO}_3$  (pH 9.2) under chopped solar-light illumination ( $100 \text{ mW cm}^{-2}$ , AM 1.5G) under  $\text{N}_2$  atmosphere.

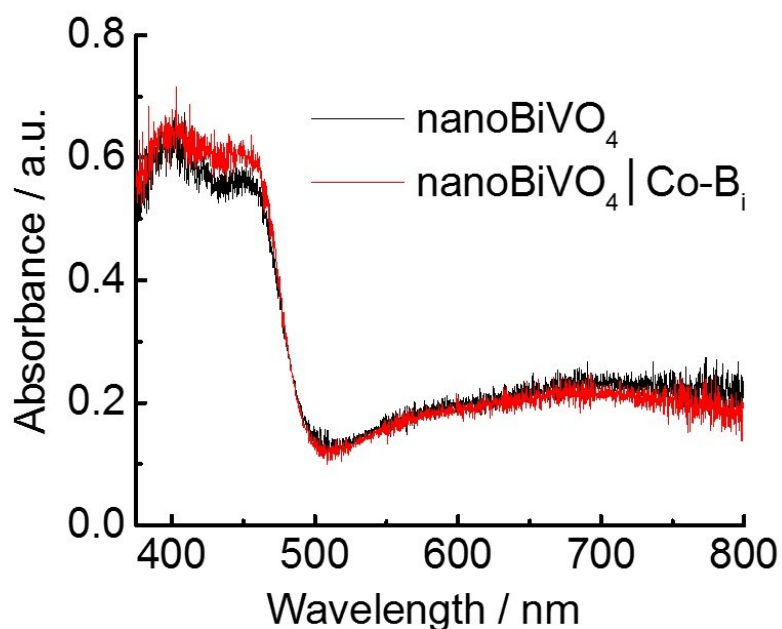

**Figure S8.** The UV-vis absorption spectra of  $\text{nanoBiVO}_4$  and  $\text{nanoBiVO}_4|\text{Co-B}_i$ .

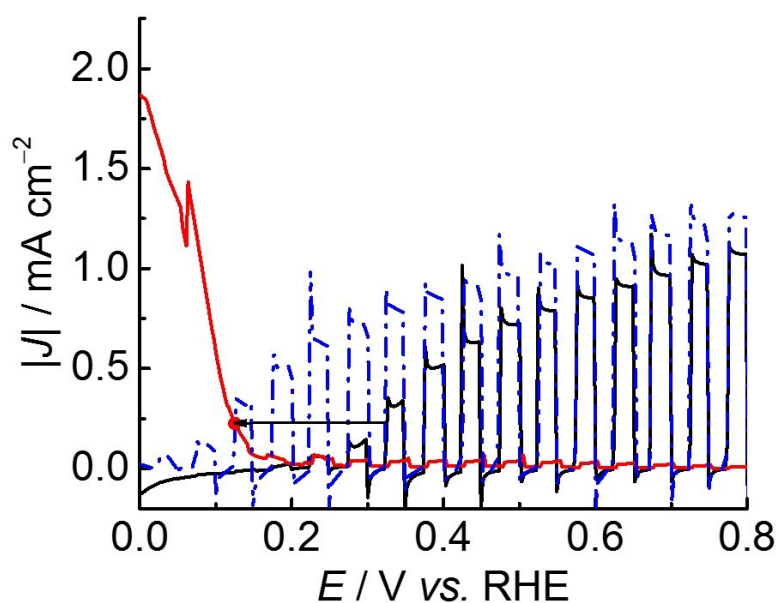

**Figure S9.** Overlaid  $|J|$ - $E$  curves of nanoBiVO<sub>4</sub>|Co-Bi (black solid) under chopped solar light irradiation (100 mW cm<sup>-2</sup>, AM 1.5G) and microCuBi<sub>2</sub>O<sub>4</sub>|Co-Bi placed in the tandem cell position (illumination was filtered by nanoBiVO<sub>4</sub>|Co-Bi, red solid). The measurements were performed in a three-electrode system in an aqueous 0.1 M Bi buffer solution containing 0.5 M Na<sub>2</sub>SO<sub>4</sub> (pH 9.2). An Ag/AgCl/KCl<sub>sat</sub> electrode was used as the reference electrode, and a platinum foil as the counter electrode. A virtual curve (blue dash dot) shows a 0.2 V cathodic shift of the photocurrent curve of nanoBiVO<sub>4</sub>|Co-Bi, and that an operating photocurrent of approximately 0.25 mA cm<sup>-2</sup> (red circle) should be obtained if an external bias of 0.2 V is applied to the BiVO<sub>4</sub>- CuBi<sub>2</sub>O<sub>4</sub> tandem cell. The nanoBiVO<sub>4</sub>|Co-Bi and the microCuBi<sub>2</sub>O<sub>4</sub>|Co-Bi electrodes have a same exposed geometrical surface area of 0.5 cm<sup>2</sup>.
